# Supplementary material for: History of Infertility and Midlife Cardiovascular Health in Female Individuals
Source: PubMed Central journal article supplement (PMC10770770; doi:10.1001/jamanetworkopen.2023.50424), 2024-01-05
Supplement: jamanetwopen-e2350424-s002.pdf [file jamanetwopen-e2350424-s002.pdf]

## Data Sharing Statement

Nichols. History of Infertility and Midlife Cardiovascular Health in Female Individuals. *JAMA Netw Open*. Published January 05, 2024. doi:10.1001/jamanetworkopen.2023.50424

### Data

**Data available:** No

### Additional Information

**Explanation for why data not available:** Per Project Viva's data use and sharing policy, data are available upon reasonable request to [project\\_viva@hphci.harvard.edu](mailto:project_viva@hphci.harvard.edu).
